# Supplementary material for: Sex, military occupation and rank are associated with risk of anterior cruciate ligament injury in tactical-athletes
Source: HighWire-hosted journal article supplement (doi:10.1136/bmjmilitary-2021-002059), 2022-02-14
Supplement: bmjmilitary-2021-002059supp001_data_supplement.pdf [file bmjmilitary-2021-002059supp001_data_supplement.pdf]

**Supplemental Table 1: ACL injury counts, population at risk, and injury rates (per 1,000 person-years) by year for male officers**

| <b>Counts</b>     | 2006           | 2007           | 2008           | 2009           | 2010           | 2011           | 2012           | 2013           | 2014           | 2015           | 2016           | 2017           | 2018           | Total            |
|-------------------|----------------|----------------|----------------|----------------|----------------|----------------|----------------|----------------|----------------|----------------|----------------|----------------|----------------|------------------|
| Army              | 372            | 360            | 375            | 352            | 384            | 412            | 356            | 360            | 348            | 281            | 278            | 248            | 202            | 4,328            |
| Navy              | 226            | 192            | 189            | 194            | 179            | 144            | 135            | 166            | 146            | 128            | 101            | 117            | 100            | 2,017            |
| Air Force         | 307            | 300            | 257            | 209            | 193            | 224            | 206            | 188            | 189            | 155            | 148            | 145            | 152            | 2,673            |
| Marines           | 82             | 84             | 84             | 74             | 101            | 85             | 80             | 79             | 62             | 58             | 66             | 62             | 48             | 965              |
| <b>Total</b>      | <b>987</b>     | <b>936</b>     | <b>905</b>     | <b>829</b>     | <b>857</b>     | <b>865</b>     | <b>777</b>     | <b>793</b>     | <b>745</b>     | <b>622</b>     | <b>593</b>     | <b>572</b>     | <b>502</b>     | <b>9,983</b>     |
| <b>Population</b> |                |                |                |                |                |                |                |                |                |                |                |                |                |                  |
| Army              | 69,311         | 71,314         | 73,556         | 76,044         | 78,737         | 81,506         | 82,562         | 82,654         | 81,903         | 79,386         | 76,947         | 74,910         | 75,110         | 1,003,939        |
| Navy              | 44,641         | 44,059         | 43,828         | 43,986         | 44,341         | 44,732         | 44,667         | 44,699         | 45,016         | 44,766         | 44,622         | 44,270         | 44,342         | 577,969          |
| Air Force         | 58,175         | 55,391         | 53,124         | 53,237         | 53,485         | 52,821         | 52,042         | 51,692         | 50,635         | 48,324         | 47,944         | 46,467         | 46,317         | 669,654          |
| Marines           | 17,900         | 18,280         | 18,869         | 19,626         | 20,223         | 20,886         | 20,727         | 20,296         | 19,777         | 19,436         | 19,307         | 19,406         | 19,713         | 254,446          |
| <b>Total</b>      | <b>190,027</b> | <b>189,044</b> | <b>189,378</b> | <b>192,893</b> | <b>196,786</b> | <b>199,944</b> | <b>199,998</b> | <b>199,341</b> | <b>197,330</b> | <b>191,912</b> | <b>188,820</b> | <b>185,053</b> | <b>185,481</b> | <b>2,506,008</b> |
| <b>Rate</b>       |                |                |                |                |                |                |                |                |                |                |                |                |                |                  |
| Army              | 5.4            | 5.0            | 5.1            | 4.6            | 4.9            | 5.1            | 4.3            | 4.4            | 4.2            | 3.5            | 3.6            | 3.3            | 2.7            | 4.3              |
| Navy              | 5.1            | 4.4            | 4.3            | 4.4            | 4.0            | 3.2            | 3.0            | 3.7            | 3.2            | 2.9            | 2.3            | 2.6            | 2.3            | 3.5              |
| Air Force         | 5.3            | 5.4            | 4.8            | 3.9            | 3.6            | 4.2            | 4.0            | 3.6            | 3.7            | 3.2            | 3.1            | 3.1            | 3.3            | 4.0              |
| Marines           | 4.6            | 4.6            | 4.5            | 3.8            | 5.0            | 4.1            | 3.9            | 3.9            | 3.1            | 3.0            | 3.4            | 3.2            | 2.4            | 3.8              |
| <b>Total</b>      | <b>5.2</b>     | <b>5.0</b>     | <b>4.8</b>     | <b>4.3</b>     | <b>4.4</b>     | <b>4.3</b>     | <b>3.9</b>     | <b>4.0</b>     | <b>3.8</b>     | <b>3.2</b>     | <b>3.1</b>     | <b>3.1</b>     | <b>2.7</b>     | <b>4.0</b>       |
