# Supplementary material for: Sex, military occupation and rank are associated with risk of anterior cruciate ligament injury in tactical-athletes
Source: HighWire-hosted journal article supplement (doi:10.1136/bmjmilitary-2021-002059), 2022-02-14
Supplement: bmjmilitary-2021-002059supp002_data_supplement.pdf [file bmjmilitary-2021-002059supp002_data_supplement.pdf]

**Supplemental Table 2:** ACL injury counts, population at risk, and injury rates (per 1,000 person-years) by year for female officers.

| <b>Counts</b>     | 2006          | 2007          | 2008          | 2009          | 2010          | 2011          | 2012          | 2013          | 2014          | 2015          | 2016          | 2017          | 2018          | Total          |
|-------------------|---------------|---------------|---------------|---------------|---------------|---------------|---------------|---------------|---------------|---------------|---------------|---------------|---------------|----------------|
| Army              | 78            | 60            | 72            | 65            | 74            | 87            | 75            | 70            | 76            | 76            | 65            | 52            | 63            | 913            |
| Navy              | 29            | 37            | 37            | 46            | 28            | 44            | 34            | 32            | 35            | 24            | 27            | 36            | 35            | 444            |
| Air Force         | 61            | 52            | 75            | 66            | 62            | 62            | 59            | 57            | 61            | 49            | 53            | 37            | 48            | 742            |
| Marines           | 9             | 6             | 9             | 3             | 16            | 3             | 5             | 6             | 8             | 6             | 13            | 10            | 5             | 99             |
| <b>Total</b>      | <b>177</b>    | <b>155</b>    | <b>193</b>    | <b>180</b>    | <b>180</b>    | <b>196</b>    | <b>173</b>    | <b>165</b>    | <b>180</b>    | <b>155</b>    | <b>158</b>    | <b>135</b>    | <b>151</b>    | <b>2,198</b>   |
| <b>Population</b> |               |               |               |               |               |               |               |               |               |               |               |               |               |                |
| Army              | 12,563        | 12,858        | 13,418        | 14,189        | 14,876        | 15,498        | 15,883        | 16,059        | 16,158        | 15,921        | 15,666        | 15,492        | 15,859        | 194,440        |
| Navy              | 7,671         | 7,612         | 7,704         | 7,901         | 8,141         | 8,427         | 8,625         | 8,869         | 9,137         | 9,328         | 9,639         | 9,919         | 10,262        | 113,235        |
| Air Force         | 13,032        | 12,263        | 11,784        | 11,967        | 12,203        | 12,182        | 12,233        | 12,518        | 12,531        | 12,165        | 12,334        | 12,374        | 12,623        | 160,209        |
| Marines           | 1,127         | 1,124         | 1,161         | 1,201         | 1,264         | 1,312         | 1,354         | 1,379         | 1,426         | 1,454         | 1,507         | 1,566         | 1,639         | 17,514         |
| <b>Total</b>      | <b>34,393</b> | <b>33,857</b> | <b>34,068</b> | <b>35,258</b> | <b>36,483</b> | <b>37,419</b> | <b>38,096</b> | <b>38,825</b> | <b>39,253</b> | <b>38,867</b> | <b>39,145</b> | <b>39,351</b> | <b>40,383</b> | <b>485,398</b> |
| <b>Rate</b>       |               |               |               |               |               |               |               |               |               |               |               |               |               |                |
| Army              | 6.2           | 4.7           | 5.4           | 4.6           | 5.0           | 5.6           | 4.7           | 4.4           | 4.7           | 4.8           | 4.1           | 3.4           | 4.0           | 4.7            |
| Navy              | 3.8           | 4.9           | 4.8           | 5.8           | 3.4           | 5.2           | 3.9           | 3.6           | 3.8           | 2.6           | 2.8           | 3.6           | 3.4           | 3.9            |
| Air Force         | 4.7           | 4.2           | 6.4           | 5.5           | 5.1           | 5.1           | 4.8           | 4.6           | 4.9           | 4.0           | 4.3           | 3.0           | 3.8           | 4.6            |
| Marines           | 8.0           | 5.3           | 7.7           | 2.5           | 12.7          | 2.3           | 3.7           | 4.3           | 5.6           | 4.1           | 8.6           | 6.4           | 3.1           | 5.7            |
| <b>Total</b>      | <b>5.1</b>    | <b>4.6</b>    | <b>5.7</b>    | <b>5.1</b>    | <b>4.9</b>    | <b>5.2</b>    | <b>4.5</b>    | <b>4.2</b>    | <b>4.6</b>    | <b>4.0</b>    | <b>4.0</b>    | <b>3.4</b>    | <b>3.7</b>    | <b>4.5</b>     |
