# Supplementary material for: Sex, military occupation and rank are associated with risk of anterior cruciate ligament injury in tactical-athletes
Source: HighWire-hosted journal article supplement (doi:10.1136/bmjmilitary-2021-002059), 2022-02-14
Supplement: bmjmilitary-2021-002059supp003_data_supplement.pdf [file bmjmilitary-2021-002059supp003_data_supplement.pdf]

**Supplemental Table 3: ACL injury counts, population at risk, and injury rates (per 1,000 person-years) by year for enlisted males**

| <b>Counts</b>     | 2006           | 2007           | 2008           | 2009             | 2010             | 2011             | 2012           | 2013           | 2014           | 2015           | 2016           | 2017           | 2018           | Total             |
|-------------------|----------------|----------------|----------------|------------------|------------------|------------------|----------------|----------------|----------------|----------------|----------------|----------------|----------------|-------------------|
| Army              | 2,141          | 2,243          | 2,377          | 2,385            | 2,553            | 2,505            | 2,399          | 2,293          | 1,970          | 1,640          | 1,495          | 1,301          | 1,064          | 26,366            |
| Navy              | 1,399          | 1,239          | 1,249          | 1,236            | 1,167            | 1,134            | 1,029          | 1,057          | 969            | 856            | 793            | 668            | 621            | 13,417            |
| Air Force         | 1,229          | 1,254          | 1,200          | 1,099            | 1,070            | 1,132            | 1,105          | 1,041          | 950            | 807            | 907            | 705            | 699            | 13,198            |
| Marines           | 979            | 1,032          | 952            | 1,032            | 995              | 1,011            | 991            | 854            | 749            | 631            | 626            | 585            | 540            | 10,977            |
| <b>Total</b>      | <b>5,748</b>   | <b>5,768</b>   | <b>5,778</b>   | <b>5,752</b>     | <b>5,785</b>     | <b>5,782</b>     | <b>5,524</b>   | <b>5,245</b>   | <b>4,638</b>   | <b>3,934</b>   | <b>3,821</b>   | <b>3,259</b>   | <b>2,924</b>   | <b>63,958</b>     |
| <b>Population</b> |                |                |                |                  |                  |                  |                |                |                |                |                |                |                |                   |
| Army              | 356,602        | 368,968        | 385,276        | 397,813          | 406,484          | 407,158          | 392,488        | 375,912        | 357,011        | 339,619        | 325,696        | 321,308        | 322,174        | 4,756,511         |
| Navy              | 252,588        | 241,732        | 235,115        | 232,772          | 228,757          | 224,608          | 218,499        | 217,744        | 218,836        | 219,525        | 218,162        | 213,620        | 216,444        | 2,938,404         |
| Air Force         | 219,775        | 212,992        | 207,765        | 211,088          | 213,972          | 214,062          | 214,789        | 215,002        | 209,281        | 200,777        | 202,960        | 207,575        | 209,625        | 2,739,662         |
| Marines           | 149,900        | 152,982        | 162,916        | 170,257          | 169,126          | 166,945          | 163,060        | 160,424        | 155,635        | 150,625        | 149,883        | 149,024        | 149,423        | 2,050,201         |
| <b>Total</b>      | <b>978,865</b> | <b>976,674</b> | <b>991,073</b> | <b>1,011,930</b> | <b>1,018,340</b> | <b>1,012,773</b> | <b>988,837</b> | <b>969,083</b> | <b>940,763</b> | <b>910,546</b> | <b>896,701</b> | <b>891,528</b> | <b>897,665</b> | <b>12,484,777</b> |
| <b>Rate</b>       |                |                |                |                  |                  |                  |                |                |                |                |                |                |                |                   |
| Army              | 6.0            | 6.1            | 6.2            | 6.0              | 6.3              | 6.2              | 6.1            | 6.1            | 5.5            | 4.8            | 4.6            | 4.0            | 3.3            | 5.5               |
| Navy              | 5.5            | 5.1            | 5.3            | 5.3              | 5.1              | 5.0              | 4.7            | 4.9            | 4.4            | 3.9            | 3.6            | 3.1            | 2.9            | 4.6               |
| Air Force         | 5.6            | 5.9            | 5.8            | 5.2              | 5.0              | 5.3              | 5.1            | 4.8            | 4.5            | 4.0            | 4.5            | 3.4            | 3.3            | 4.8               |
| Marines           | 6.5            | 6.7            | 5.8            | 6.1              | 5.9              | 6.1              | 6.1            | 5.3            | 4.8            | 4.2            | 4.2            | 3.9            | 3.6            | 5.4               |
| <b>Total</b>      | <b>5.9</b>     | <b>5.9</b>     | <b>5.8</b>     | <b>5.7</b>       | <b>5.7</b>       | <b>5.7</b>       | <b>5.6</b>     | <b>5.4</b>     | <b>4.9</b>     | <b>4.3</b>     | <b>4.3</b>     | <b>3.7</b>     | <b>3.3</b>     | <b>5.1</b>        |
