# Supplementary material for: Sex, military occupation and rank are associated with risk of anterior cruciate ligament injury in tactical-athletes
Source: HighWire-hosted journal article supplement (doi:10.1136/bmjmilitary-2021-002059), 2022-02-14
Supplement: bmjmilitary-2021-002059supp004_data_supplement.pdf [file bmjmilitary-2021-002059supp004_data_supplement.pdf]

**Supplemental Table 4: ACL injury counts, population at risk, and injury rates (per 1,000 person-years) by year for enlisted females**

| <b>Counts</b>     | 2006           | 2007           | 2008           | 2009           | 2010           | 2011           | 2012           | 2013           | 2014           | 2015           | 2016           | 2017           | 2018           | Total            |
|-------------------|----------------|----------------|----------------|----------------|----------------|----------------|----------------|----------------|----------------|----------------|----------------|----------------|----------------|------------------|
| Army              | 317            | 284            | 300            | 311            | 291            | 335            | 291            | 277            | 235            | 221            | 210            | 172            | 162            | 3,406            |
| Navy              | 157            | 155            | 171            | 174            | 120            | 147            | 160            | 151            | 148            | 152            | 149            | 140            | 129            | 1,953            |
| Air Force         | 218            | 227            | 184            | 209            | 190            | 157            | 164            | 174            | 159            | 148            | 127            | 150            | 145            | 2,252            |
| Marines           | 55             | 57             | 55             | 59             | 74             | 78             | 54             | 52             | 63             | 44             | 45             | 54             | 49             | 739              |
| <b>Total</b>      | <b>747</b>     | <b>723</b>     | <b>710</b>     | <b>753</b>     | <b>675</b>     | <b>717</b>     | <b>669</b>     | <b>654</b>     | <b>605</b>     | <b>565</b>     | <b>531</b>     | <b>516</b>     | <b>485</b>     | <b>8,350</b>     |
| <b>Population</b> |                |                |                |                |                |                |                |                |                |                |                |                |                |                  |
| Army              | 57,078         | 57,448         | 58,491         | 59,505         | 60,574         | 60,858         | 58,291         | 56,108         | 54,367         | 53,170         | 52,769         | 53,278         | 53,860         | 735,798          |
| Navy              | 42,281         | 40,962         | 40,877         | 41,868         | 42,966         | 43,936         | 44,216         | 46,119         | 47,615         | 49,165         | 50,548         | 50,825         | 52,944         | 594,325          |
| Air Force         | 55,031         | 53,268         | 51,798         | 52,144         | 51,625         | 50,689         | 50,062         | 49,662         | 48,046         | 46,445         | 47,724         | 49,930         | 51,819         | 658,244          |
| Marines           | 9,955          | 10,320         | 10,954         | 11,622         | 12,120         | 12,419         | 12,484         | 12,710         | 12,816         | 12,703         | 13,165         | 13,716         | 14,136         | 159,121          |
| <b>Total</b>      | <b>164,345</b> | <b>161,998</b> | <b>162,120</b> | <b>165,140</b> | <b>167,286</b> | <b>167,902</b> | <b>165,054</b> | <b>164,600</b> | <b>162,844</b> | <b>161,484</b> | <b>164,207</b> | <b>167,749</b> | <b>172,759</b> | <b>2,147,488</b> |
| <b>Rate</b>       |                |                |                |                |                |                |                |                |                |                |                |                |                |                  |
| Army              | 5.6            | 4.9            | 5.1            | 5.2            | 4.8            | 5.5            | 5.0            | 4.9            | 4.3            | 4.2            | 4.0            | 3.2            | 3.0            | 4.6              |
| Navy              | 3.7            | 3.8            | 4.2            | 4.2            | 2.8            | 3.3            | 3.6            | 3.3            | 3.1            | 3.1            | 2.9            | 2.8            | 2.4            | 3.3              |
| Air Force         | 4.0            | 4.3            | 3.6            | 4.0            | 3.7            | 3.1            | 3.3            | 3.5            | 3.3            | 3.2            | 2.7            | 3.0            | 2.8            | 3.4              |
| Marines           | 5.5            | 5.5            | 5.0            | 5.1            | 6.1            | 6.3            | 4.3            | 4.1            | 4.9            | 3.5            | 3.4            | 3.9            | 3.5            | 4.6              |
| <b>Total</b>      | <b>4.5</b>     | <b>4.5</b>     | <b>4.4</b>     | <b>4.6</b>     | <b>4.0</b>     | <b>4.3</b>     | <b>4.1</b>     | <b>4.0</b>     | <b>3.7</b>     | <b>3.5</b>     | <b>3.2</b>     | <b>3.1</b>     | <b>2.8</b>     | <b>3.9</b>       |
